# Supplementary material
Source: publisher figshare collection journal article supplement (https://brill.figshare.com/articles/dataset/_/21080656)
Supplement: Supplementary file 1 [file 3]

## Sheet: Information
This file belongs to the paper
Prytz, J., Ahl, L. M., & Jankvist, U. T. (2022). An innovation’s path to the mathematics textbooks: A retrospective analysis of the successful scaling of the Swedish PUMP project. Implementation and Replication Studies in Mathematics Education, 2(2). DOI: 10.1163/26670127-bja10005
The file contains two types of data
1) The task number of all analyzed textbook tasks.
2) The M-code for each analyzed task.
The task numbers have two parts: first a number symbol, then a lettersymbol. There are however exceptions, which is explained as they occur.
The M-codes stem from the PUMP matrix for multiplication, see Figure 2 in the paper or here
The data is accounted for through matrices in the following way:
- Each textbook has its own matrix.
- Depending on year of publication, the matrices are placed in three periods: 1) 1970-1973, 2) 1977-1980, 3) 1984-1993
- The number symbols for the tasks are entries in the vertical direction.
- The letter symboks for the tasks are entries in the horizontal direction.
- The cells contain the M-codes.
The orignal M-codes have in some cases been extended with additional symbols.
This since the PUMP-matrix only covers multiplication with one or two digit numbers.
The additional symboles are added to the right of the original M-codes.
The additional letters and symbols have the following meaning.
H - the biggest number is a three digit number (100-999), the smallest number are either one digit or two digit.
T - the biggest number is a four digit number (1000-9999), the smallest number are either one digit or two digit.
Two digit number within parentheses (XY) indicate how many tens transitions (X) and how carrying digits (Y) are needed to solve the task.
In a very few cases the M-code 75 appears. It means that the addition algorith involves three tens transitions.
When the statistics accounted for in the paper were created, only the original M-codes were considered.

## Sheet: Author team I
	Textbook analysis period 1: 1970-1973									Textbook analysis period 2: 1977-1980									Textbook analysis period 3: 1984-1993
	Hultman, C., Ljung, B. & Kristiansson, M. (1972).									Hultman, C., Ljung, B. & Kristiansson, M. (1978)									Jylltorp, A., Alm, L., Ljung, B. & Svenblad, M. (1989)
	Treans nya matematik b.									Treans matematik b. (2. Uppl.)									Kombi: matematik för grundskolan. 1 M, Grundbok : mellanstadiet.
Task nr.	a	b	c						Task nr.	a	b	c	d					Task nr.	a	b	c
29	21	21	21						126	21	21	21	21					413	21H	21H	21H
30	21	21	21						127	21	21	21	21					414	32H	21H	32H
31	21	21	21						128	21	21	21	21					415	21H	21H	21H
32	21H	21H	21H						129	21H	21H	21H						416	21H	21H	32H
33	21H	21H	21H						130	21H	21H	21H						417	32H	32H	32H
34	21T	21T	21T						131	21T	21T	21T						418	32H	32H	32H
35	32	32	32						132	32	32	32						419	04B	04A	04A
36	32H	32H	32H						133	32	32	32						420	04A	04A	04B
37	32H	32H	32H						134	32H	32H	32H						421	04A	04B	04A
38	21H	21H	21H						135	32H	32H	32H						422	04A	04A	04A
39	32H	32H	32H						136	32H	32H	32H						423	04B	04A	04A
40	32H	32H	32H						137	32H	32H	32H						424	04A	04A	04A
41	23	23	23						138	32H	32H	32H						425	04A	04A	04A
42	23	23	23						139	32H	32H	32H						426	04A	04B	04B
43	23	23	23						140	32H	32H	32H						427	23	34	34
44	34	34	34						150	23	23	23						428	23H	34H	23H
45	34	34	34						151	23	23	23						429	23H	34H	35H(32)
46	34	34	34						152	23	23	23						430	23H	34H	34H
47	23H	23H	23H						153	23	23	23						431	34H	34H	23H
48	34H	34H	34H						154	34	34	34						432	34H	34H	34H
49	34H	34H	34H						155	34	34	34
									156	34	34	34						456	21H	34H	32
									157	34	34	34						457	32	32	32
									158	34	34	34						458	32	32	32
									159	23H	23H	23H						459	3	3	04A
	Hultman, C., Kristiansson, M. & Ljung, B. (1970)								160	34H	34H	34H						460	04A	04A	04A
	Fyrans nya matematik. b, Vårterminen								161	34H	34H	34H						461	04A	04A	04A
																		462	3	04A	04B
Task nr.	a	b	c															463	04B	04B	04B
667	41	41	43															464	04B	04B	04B
668	41	43	43							Jylltorp, A., Hultman, C., Kristiansson, M. & Ljung, B. (1980)								465	23H	23H	23H
669	41	44	53		Here an alternative algorithm is used					Min räknebok. Fyrans matematik. Huvudbok 4 b								466	34	34	34
670	41	41	51		These numbers are not included in													467	34	34	34
671	44	44	54		the statistics.				Task nr.	a	b	c						468	34H	34H	23H
672	44	54	54						733	21	21H	21H						469	34	34	34
									734	32H	32H	32H						470	34H	34H	34H
676	55(31)	45(42)	45(42)						735	32H	32H	32H						471	35H	35H	35H
677	45(42)	55(42)	65(42)						736	3	04A	04B						472	35H(32)	35H	35H
678	44	55(20)	54						737	04B	04A	04A						473	35H	35H(32)	34H
679	53H	45H(32)	41H						738	04A	04A	04B						474	35H(32)	35H(32)	35H(32)
680	45(22)	45H(32)	45H(31)						739	04A	04A	04A						475	35T	35T	34H
681	45H(21)	65H(43)	55H(53)						740	23	23	23						476	35H(32)	35T(22)	35T(22)
682	65H(44)	55H(32)	45H(42)						741	23H	23H	23H
683	75H(32)	55H(42)	55H(42)						742	34H	23H	34H
684	64H	55H(32)	45H(64)						743	34H	34H	35H(32)
685	45H(32)	45H(64)	55H(64)						744	35H(22)	35H(32)	35H(32)							Jylltorp, A., Alm, L., Ljung, B. & Svenblad, M. (1990).
686	65H(64)	65H(64)	65H(64)						745	35H(32)	35H(32)	34H							Kombi: matematik för grundskolan. 2 M, Grundbok : mellanstadiet.
687	65H(42)	65H(42)	45H(42)
									753	41	41	41						Task nr.	a	b	c
									754	42	42	42						231	21H	21H	21H
									755	42	42	42						232	32H	32H	32H
									756	43	42	42						233	32	32	32
									757	42	42	41						234	04A	04A	04B
									758	42	42	42						235	04A	04A	04B
									759	52	51	51						236	04A	04B	04B
									760	51	53	51						237	34	23	23
									761	62	62	64						238	23H	23H	23H
									762	62	62	51						239	34H	23H	34H
									763	62	62	63						240	35H(22)	35H(22)	34H
									764	44	44	53						241	35H(32)	35H(22)	35H(22)
									765	43	53	64						242	35H(22)	35H(32)	34H
									766	64	64	64						243	35H(32)	35H(32)	35H(32)
									767	54	54	64						244	35T(22)	35T(22)	35T(43)
									768	64	64	64						245	35T(33)	35T(22)	35T(22)
									769	45(42)	55(32)	55(31)
									770	55(20)	55(42)	45(42)						268	23	34	34
									771	65(42)	44	65(42)						269	34	34	34
									772	55(31)	45(42)	45(42)						270	34	34	34
									773	45(42)	55(42)	55(31)						271	34	34	34
									774	45(42)	54	65(42)						272	34	34	34
																		273	34	34	34
									776	41H	41H	41H
									777	41H	41H	42H						275	23H	34H	34H
									778	21H	41H	41H						276	35H(32)	34H	32H
									779	53H	45(32)	55H(33)						277	34H	34H	34H
									780	45H(22)	45H(32)	45H(31)						278	34H	34H	35H(32)
									781	44H	55H(43)	55H(53)						279	35H(22)	35H(32)	35H(32)
									782	65H(44)	55H(32)	45H(42)						280	35H(32)	35H(32)	34H
									783	75H(32)	55H(42)	55H(42)
									784	64H	55H(32)	45H(64)
									785	45H(32)	45H(64)	55H(64)
									786	65H(64)	65H(64)	65H(64)							Kombi. Matematik för grundskola. Grundbok 4M (1992)
									787	65H(42)	65H(42)	45H(42)							Jylltorp, A., Ljung, B. & Westman, M. (1992).
																			Kombi: matematik för grundskolan. 4 M, Grundbok : mellanstadiet.
																		Task nr.	a	b	c
																		679	43	42	42
																		680	42	42	41
																		681	52	51	51
																		682	51	53	51
																		683	54	54	54
																		684	64	64	64
																		685	45(42)	55(32)	55(31)
																		686	32H	62H	52H
																		687	55(42)	34	65H(22)
																		688	55H(64)	55H(32)	65H(64)
																		689	41H	45H(54)	45
																		690	55H(32)	41T	55T(32)
																		691	45H(42)	65T(54)	45T(64)
																			Jylltorp, A., Ljung, B. & Westman, M. (1993).
																			Kombi: matematik för grundskolan. 5 M Grundbok : mellanstadiet.
																		Task nr.	a	b	c
																		378	43	42	42
																		379	42	42	41
																		380	52	52	51
																		381	51	53	51
																		382	54	54	64
																		383	64	64	64
																		384	45(42)	55(32)	55(31)
																		385	32H	62H	52H
																		386	55H(42)	34	65H(22)
																		387	55H(64)	65H(32)	65H(64)
																		388	41H	45H(54)	45(42)
																		389	55H(32)	41T	55T(32)
																		390	45H(42)	65T(52)	45T(64)

## Sheet: Author team II
	Textbook analysis period 1: 1970-1973									Textbook analysis period 2: 1977-1980												Textbook analysis period 3: 1984-1993
	Nilsson, B., Johansson, I. & Lindström, S. (1972).									Nilsson, B. & Johansson, I. (1979)												Skoogh, L., Nilsson, B. & Johansson, H. (1986)
	Matematik: mellanstadiet 1 M Övningsbok A.									Matematik för oss. 4, Grundbok med övningsuppgifter												Räkneresan. A.
																						Chapter 5
Task nr.	a	b	c
440	32H	32H	21H
441	21H	32H	32H						Task nr.	a	b	c	d	e	f	g	h				Task nr.	a	b	c	d	e	f	g	h
442	35H(22)	34H	34H						412	02A	02A	02A	02A								15	21	21	21	21	21	21	21	21
443	32H	21H	23H						413	02A	1	02A	1								16	21H	21H	21H	21H
444	34H	34H	32H						414	02A	1	02A	02A								17	21H	21H	21H	21H
445	32H	32H	32H						415	21	21	21	21								18	21H	21H	21H	21H	21H	21H	21H	21H
446	32H	32H	21H						416	21H	21H	21H	21H								19	21H	21H	21H	21H	21H	21H	21H	21H
447	32H	32H	32H						417	32H	32H	32H	32H								21	32	32	32	32
448	34H	34H	21H						418	21H	21H	21H	21H								22	32	32	32H
449	34H	34H	34H						419	32H	32H	32H	32H								23	32H	32H	32H
458	35H(32)	35H(32)							420	32H	32H	32H	32H								24	32	32	32H
459	34H	34H							421	32H	21H	32H	32H								25	32H	32H	32H
460	34H	34H							426	12	12	11									26	32H	32H	32H
465	35H(32)	34H	35H(32)						427	12	11	12									27	32H	32H	32H
466	34H	34H	34H						428	12	12	12								Track 1	43	21	21	21	21
467	34H	34H	34H						429	12	12	12									44	21	21	21	21
468	35H(32)								430	12	12	12									45	21H	21H	21H	21H
469	35H(32)								431	12	12	12									46	21H	21H	21H	21H
471	35H(32)								Ba	3	04C	04A	3								50	32	32	32H
									Bb	04A	3	04A	3								51	32	32	32H
									Bc	04C	04C	04B	04B								52	32	32	32H
	Nilsson, B., Johansson, I. & Lindström, S. (1973)								Da	04C	04C	04B	04C								53	32	32	32H
	Matematik: mellanstadiet. 2 M Övningsbok.								Db	04B	04B	04B	04C							Track 2	62	32	32	32
									Dc	04B	04B	04B	04B								63	32	32	32
Task nr.	a	b	c						F	23	23	23	23H	23H	34H	34H	34H				64	32	32	32
95	52	54							481	02A	02A	02A	02A								65	32	32	32
96	45(32)	45(42)							482	02A	02A	02A	02A								66	32H	32H	32H
97	45(42)	65(32)							483	02A	02A	02A	02A								67	32H	32H	32H
98	41	42	62						484	02A	02A	02A	02A								68	32H	32H	32H
99	53	45(22)	45(31)						485	02A	02A	02A	02A								69	32H	32H	32H
100	45(31)	45(31)	44						486	02A	02A	02A	02A
101	65(42)	45(31)	55(42)						487	04A	04A	3	04B
102	45(20)	55(32)	55(20)						488	04B	04B	04A	04B
103	44	53	53						489	04B	3	04A	04B									Skoogh, L., Nilsson, B. & Johansson, H. (1987)
104	45(20)	45(42)	55(42)						490	04B	04B	04B	04B									Räkneresan. B
105	65(42)	55(31)	55(42)						491	21	21	21										Chapter 8
106	55(20)	55(42)	55(42)						492	21H	21H	32H
107	44	54	45(32)						493	23	23	23									Task nr.	a	b	c	d
108	52	55(42)	45(42)						494	23H	23H	23H									3a	3	04B	04B	3
109	55(20)	55(32)	45(42)						495	23H	23H	23H									3b	04A	04A	04A	3
111	61H	55H(32)							496	34H	34H	34H									3c	04C	3	04A	04A
112	51T	65(54)							497	35H(32)	34H	34H									3d	04a	3	04A	04A
113	55T(55)	44T							498	23H	23H	23H	34H								4a	3	04C	04A	04A
114	53H	45H(22)	55H(42)						499	34H	34H	34H	34H								4b	04A	04B	04B	04B
115	55T(33)	53H	45H(33)						500	34H	34H	34H	34H								4c	3	04B	04B	04B
116	65T(42)	75H(64)	45T(22)						503	02A	02A	02A									4d	04A	3	04B	04B
									504	02A	02A	02A									6	23	23	23	23
	Here I stopped								505	02A	02A	02A									7	34	34	34	34
	The majority of tasks 117-123 have two or more ten transitions								506	02A	02A	02A								Track 1	8	34	34	23	34
									507	02A	02A	02A									9	34	34	34	34
									508	02A	02A	02A									11	34H	34H	34H	34H
									518	21H	21H	32H									12	34H	34H	34H	34H
									519	32H	32H	32H									13	34H	34H	34H	34H
									520	23H	23H	23H									14	34H	34H	34H	34H
									521	23H	23H	23H									27	02A	02A	02A	02A
									522	23H	23H	34H									28	02A	02A	02A	02A
									523	34H	34H	34H									29	1	02A	02A	02A
									524	34H											30	02A	1	1	02A
									525	32H											31	02A	02A	02A	02A
									526	34H											32	02A	02A	02A	1
									527	32											33	02A	02A	02A	02A
									528	34											34	02A	02A	02A	02A
									529	34											35	02A	02A	02A	02A
									530	23											36	04A	04A	04A	04A
									Ea	04A	04A	04A	04A								37	04A	04A	04A	04A
									Eb	04A	04A	04A	04A								38	04A	04A	04A	04A
									Ec	04B	04A	04A	04A								39	23	23	34	34
									Fa	04A	04B	04B	04B								40	34	34	34	34
									Fb	04B	04B	04B	04B							Track 2	41	34	34	34	34
									Fc	04B	04B	04B	04B								42	34	34	32	34
									G	34H	34H	34H	34H	34H	34H						47	34H	34H	34H	23H
									H	35H(22)	35H(32)	34H	35H(32)	34H	35H(32)						48	34H	34H	23H	34H
									682	04B	04B	04B	3								49	34H	34H	23H	34H
									683	04A	04A	04A	3								50	34H	34H	34H	34H
									684	04A	04B	04B	04B								70	04B	04B	04B	04B
									685	04A	04B	04B	04B								71	04B	04B	04B	04B
									686	34H	34H	34H									72	04B	04B	04B	04A
									687	34H	34H	34H									73	34	34
									688	34H	34H	34H									74	34	34
									689	34H	34H	34H									75	34	34
									690	34H	34H	34H									76	34	34
									691	34H	34H	34H									77	35H(32)	34H	35H(32)	34H
									692	34H	34H	34H									78	34H	35H(32)	34H	35H(32)
									693	34H	34H	34H									79	35H(32)	34H	34H	35H(22)
									694	34H	34H	34H									80	34H	34H	35H(32)	34H
									696	35H(32)	35H(32)	35H(32)	35H(32)								81	35H(32)	35H(32)	35H(32)	35H(32)
									697	35H(32)	35H(32)	35H(32)	35H(32)								82	35H(32)	35H(32)	35H(32)	35H(32)
									698	35H(32)	35H(32)	35H(32)	35H(32)
									699	35H(32)	35H(32)	35H(32)	35H(32)
									700	35H(32)	35H(32)	35H(32)	35H(32)
									701	35H(32)	35H(32)	35H(32)	35H(32)									Skoogh, L., Nilsson, B. & Johansson, H. (1988)
									702	34H	34H											Räkneresan. C
									703	34H	34H											page 57, track 2
									704	34H	34H
									715	35H(32)	34H	35H(32)	35H(32)								Task nr.	a	b	c	d	e	f
									716	34H	35H(32)	34H	34H								115	41	41	41	45(20)	52	51
									717	35H(32)	34H	35H(32)	35H(32)								117	43	45(31)	45(31)
									718	35H(32)	35H(32)	35H(32)	34H								118	44	55(31)	45(31)
																					119	44	45(31)	45(31)
																					120	44	45(31)	45(31)
																					121	53	55(31)	55(31)	53	54	55(31)
																					122	53	65(31)	55(31)	54	55(31)	55(31)
										Nilsson, B. & Johansson, I. (1980)
										Matematik för oss. 5, Grundbok med övningsuppgifter
									Task nr.	a	b	c	d	e	f							Skoogh, L., Nilsson, B. & Johansson, H. (1990)
									A	02A	02A	02A										Räkneresan. E
										02A	02A	02A										Chapter 1, page 33, Track 2
										02A	02A	02A
										02A	02A	02A									Task nr.	a	b	c	d
										02A	02A	02A									109	65(22)	45(31)	45(31)	55H(22)
									Ba	1	02A	02A	02A	02A	02A						110	55(42)	55(32)	55(31)	45(54)
									b	1	02A	02A	02A	02A	02A						128	45(31)	54	45(42)	45(42)
									c	02A	02A	02A	1	02A	02A						129	61	55(42)	45(42)	42
									d	04B	04A	04A	04A	04A	04B						132	45H(42)	54H	55H(64)	45H(64)
									e	04B	04A	04A	04A	04A	04A						133	34	55H(64)	65H(64)	75H(64)
									C	32	32	34	34
									F	41	42	41	43	43	43
									g-l	64	53	63	45(42)	55(42)	65(42)
									91	45(20)	45(20)	42	45(20)	45(20)	45(20)
									92	44	45(31)	45(31)	45(31)	44	45(31)
									93	53	55(31)	53	54	53	54
									94	52	65(32)	45(32)	45(42)
									95	45(42)	65(32)	45(22)	65(42)
									96	55(42)	55(32)	45(42)	55(42)
									97	65(42)	55(31)	55(42)	55(42)
									98	44	44	55(22)
									99	52	55(42)	45(42)
									100	55(20)	55(32)	45(42)
									101	61H	55H(32)
									102	51T	65H(54)
									103	55T(55)	45T(21)
									104	53H	45H(22)	55H(42)
									105	45T(33)	65H(22)	45H(33)
									106	65T(42)	65H(53)	45T(22)
									107	45H(64)	55T(86)	61T
									108	55T(43)	85T(64)	55T(64)
									109	45H(53)	55H(32)	45H(44)
									110	65T(43)	55T(53)	75T(65)
									111	45T(20)	65H(32)	65T(54)
									112	44H	65T(42)	71T

## Sheet: Author team III
	Textbook analysis period 1: 1970-1973									Textbook analysis period 2: 1977-1980									Textbook analysis period 3: 1984-1993
	Håstad, M., Öreberg, C. & Svensson, L. (1972)									Håstad, M., Öreberg, C. & Svensson, L. (1980)									Alsnäs, S. & Svensson, L. (1984)
	Hej matematik. Åk 3, [Haj]									Hej matematik Åk 3 [Makrill]									Alfa: mellanstadiets matematik. Grundbok A
Task nr.	a	b	c						Task nr.	a	b	c	d					Task nr.	a	b	c	d	e	f	g	h	i	j	k	l
136	21	21	21						527	21	21	21	21					343	3	3	3	3
137	21	21	21						528	21	21	21	21					344	04A	3	04A	04A
138	21	21	21						529	21	21	21	21					345	3	04B	04A	04B
139	21	21	21						530	21	21	21	21					346	04A	04B	3	04B
213	32	32	32						531	21	21	21	21					347	04A	04A	04A	04A
214	32	32	32						532	21	21	21	21					348	04AH	044H	04AH	04AH
215	32	32	32						533	21	21							349	21	21	21	21
216	32	32	32						534	32	32	32	32					350	21	21	21	21
217	32	32	32						535	32	32	32	32					351	32	32	32	32
289	21	23	23						536	32	32	32	32					352	32	32	32	32
290	23	23	21						537	32	34	32	32					353	23	23	23	23
291	23	23	23						538	32	32	21	32					354	23	23	23	23
292	23	23	23						539	32	32	32	32					355	34	34	34	34
									540	32	32							356	34	34	34	34
																		357	21	32	23	34
	Håstad, M., Öreberg, C. & Svensson, L. (1972)																	358	23	32	21	34
	Hej matematik. Åk 3, [Makrill]									Håstad, M., Öreberg, C. & Svensson, L. (1980)								366	21H	21H	21H	21H
										Hej matematik Åk 3 [Ål]								367	32H	32H	32H	32H
Task nr.	a	b	c	d														368	23H	23H	23H	23H
1	23	23	23						Task nr.	a	b	c	d					369	35H(22)	35H(22)	35H(22)	35H(22)
2	23	23	23						130	34	23	32	34					370	35H(32)	35H(32)	35H(32)	35H(32)
3	23	23	23						131	34	34	23	34					371	34H	35H(32)	34H	35H(32)
4	23	23	23						132	34	34	34	34					372	35H(22)	35H(32)	35H(32)	35H(32)
8	34	34	34	34					133	34	34	34	34					373	34H	35H(32)	34H	34H
9	34	34	34						134	34	34	34	34					1	04A	04B	04B	04B	04B	04B
10	34	34	34						135	34	34	34	34				MINITEST 2B	2	32	21	32	34	34	34	34	34	34	34	34	34
11	34	34	34						136	34	34	21	34					3	23H	32H	32H	35H(32)	35H(32)	35H(32)	34H	34H	35H(32)	34H	35H(32)	35H(32)
12	34	34	34						137	34	23	34	34					381	41	41	41	41
13	34	34	34						138	21	23	23	32					382	41	41	41	41
14	34								139	34	21	34	34					383	41	41	41	41
15	34	34	34						140	34	32	32	34					384	42	42	42	42
16	34	34	34						141	34	34	34	32					385	42	42	42	42
17	34	34	34						142	23	34							386	42	52	42	42
18	34	34	34						174	34	34	34	34					387	45(20)	45(20)	45(20)	45(20)
19	34	34	34						175	34	34	32	34					388	45(20)	45(20)	45(20)	45(20)
20	34	34	34						176	21	34	34	23					389	45(20)	45(20)	45(20)	45(20)
21	34	34	34						177	34	23							390	41	42	42	42
22	34	34	34						356	21H	21H	23H	34H					391	42	42	42	45(20)
23	34	34	21						357	34H	35H	34H	35H					392	42	45(20)	45(20)	42
24	34	34	34						358	35H	32H	34H	35H
25	34	34							359	34H	35H	34H
63	34	34	34						360	35H
64	34	34	34						361	23H	34H	35H	34H
65	34	32							362	35H	34H	34H	35H
66	34	21	34						363	34H	34H
67	34	34	23						366	23
68	34	23							367	23
									368	34
									369	34
	Håstad, M., Öreberg, C. & Svensson, L. (1970)								370	34
	Hej matematik Åk 4 [Maskros]								371	34
									372	34
Task nr.	a	b	c	d	e	f			373	34
37	55(20)	45(42)	45(42)	45(42)	52	45(42)			374	34
38 (1-6)	65(32)	44	55(42)	54	64	65(42)			375	34
38 (7-12)	45(42)	55(20)	42	55(32)	45(42)	55(31)			376	32
38 (13-18)	44	44	65(42)	44	44	55(42)			377	32
38 (19-24)	55(20)	45(42)	55(32)	55(42)	65(42)	55(42)			378	32
38 (25-30)	65(42)	42	55(32)	55(42)	55(20)	45(42)			379	34
38 (31-36)	45(42)	65(42)	42	45(20)	55(42)	45(32)			380	34
38 (37-42)	65(42)	55(42)	55(42)	54	52	45820)			381	34
38 (43-48)	42	44	44	45(20)	43	62			382	34
38 (49-50)	42	42							383	34
									384	34
Here I stopped.									385	34
The matrix do not suffice with the smallest factor being a three-digit number.									386	34
									387	34
Task 38 comprised a list of subtasks without letter symbols.									388	34
									389	34
									390	34
									413	34	34	34
									414	35H	35H	34
									415	34H	34H	32
									416	34H	35H	34
										Håstad, M., Öreberg, C. & Svensson, L. (1977)
										Hej matematik Åk 4 [Maskros]
									Task nr.	a	b	c	d	e	f
									180 (1-6)	41	41	51	41	51	41
									180 (7-12)	51	41	41	51	41	41
									180 (13-18)	41	51	51	41	51	41
									180 (19-21)	61	52	51
									Task 180 comprised a list of subtasks without letter symbols.
										Håstad, M., Öreberg, C. & Svensson, L. (1978)
										Hej matematik Åk 5 [Ek]
									Task nr.	a	b	c	d	e	f
									91	41	51	51	41	41	51
									92	45(32)	44	54	45(42)	55(42)	45(42)
									93	41H	41H	45H(44)	55H(32)	65H(31)	55H(53)
										Here I stopped.
										The matrix do not suffice with the smallest factor being a four digit number or more.

## Sheet: Author team IV
	Textbook analysis period 2: 1977-1980											Textbook analysis period 3: 1984-1993
	Undvall, L., Olofsson, K., Forsberg, S., Sköldenberg, J. & Wallin, F. (1979)											Undvall, L., Olofsson, K., Forsberg, S., Sköldenberg, J. & Wallin, F. (1985)
	Matematikboken: [för mellanstadiet]. 4, [Årskurs 4]											Matematikboken: [för mellanstadiet]. 4 [Årskurs 4]
Task nr.	a	b	c	d	e						Task nr.	a	b	c	d	e
167	21	21	21	21							214	21	21	21	21
168	21	21	21	21							215	21	21	21	21
169	21	21	21	23							216	21	21	21	21
170	23	23	23	23							217	23	32	21	21
171	23	23	23	23							218	21	32	32	32
172	23	21	23	34							219	23	23	23	23
173	23	23	21	21							220	23	23	23	23
174	23	34	23	21							221	23	34	23	23
175	23	21	23	23							222	23	34	23	23
176	34	34	34	34							223	34	34	34	34
177	34	32	34	34							224	34	34	34	34
178	34	34	34	34							225	34	34	34	34
179	34	34	32	34							226	21H	21H	21H	21H
180	34	34	34	34							227	23H	34H	23H	23H
181	34	34	34	34							228	23H	23H	32H	32H
182	34	32	34	34							229	35H(22)	35H(22)	34H	34H
183	32	34	34	32							230	34H	34H	34H	35H(32)
184	34	32	34	34							231	35H(32)	35H(32)	35H(32)	35H(32)
185	34	32	34	34							232	35H(32)	35H(32)	35H(32)	35H(32)
186	34	34	34	34							233	34H	35H(32)	35H(32)	35H(32)
187	34	32	34	34							244	41	51	41
188	41	51	41								245	41	41	41
189	53	43	41								246	51	41	61
190	44	41	41								247	43	43	53
191	43	41	53								248	41H	41H	41H
192	53	41	44								249	41H	41H	53H
193	43	41	53								250	41H	41H	41H
194	53	44	41								251	51H	41H	41H
195	41	51	51								252	44	53	44
196	41H	41H	41H								253	53	51	42
197	41H	41H	53H								254	45(20)	53	43
198	41H	41H	41H								255	54	54	54
199	51H	41H	41H								256	53H	43H	41H
200	53H	43H	41H								257	45H(32)	61H	55H(32)
201	45H(32)	61H	55H(32)								258	61H	42H	52H
202	61H	42H	52H								259	51H	41H	42H
203	51H	41H	42H								260	42	52	45(20)
204	53	53	42								261	45(20)	45(20)	65(20)
205	53	53	44								262	45(20)	43	64
206	55(32)	44	41								263	55(31)	45(32)	64
207	54	54	44								264	55(42)	42	55(20)
208	45(31)	43	64								265	55(31)	64	45(20)
209	45(42)	55(32)	42								266	41H	41H	51H
210	55(42)	42	45(20)								267	41H	41H	61H
211	54	64	45(20)								268	63H	65H(20)	45H(32)
212	64H	55H(20)	45H(32)								269	65H(32)	54H	43H
213	65H(32)	54H	43H								270	45H(20)	62H	45H(32)
214	45H(20)	62H	45H(32)								271	52H	65H(64)	41H
215	52H	65H(64)	41H								272	55H(33)	53H	55H(32)
216	55H(33)	53H	55H(32)								273	55H(33)	65H(54)	45H(22)
217	55H(33)	65H(54)	45H(22)								274	45H(44)	45H(32)	45H(20)
218	45H(44)	55H(22)	45H(20)								275	65H(33)	55H(43)	55H(32)
219	65H(33)	55H(43)	55H(32)								276	45H(42)	55H(22)	45H(32)
220	42	54	44								277	45H(43)	65H(32)	45H(32)
221	54	54	54								278	61H	65H(53)	55H(43)
222	51	55H(42)	42								279	45H(22)	65H(54)	45H(53)
223	45(20)	41	45(32)								280	55H(32)	45H(64)	55H(31)
224	55(42)	44	54								281	45H(43)	65H(53)	65H(32)
225	45(42)	55(32)	44								282	44H	55H(64)	45H(20)
226	45(42)	64	55(20)								283	55H(32)	55H(64)	45H(44)
227	65(32)	65(32)	64
228	45H(42)	55H(20)	45H(32)
229	45H(43)	65H(32)	45H(32)
230	61H	65H(54)	55H(43)
231	45H(22)	65H(54)	45H(53)
232	55H(32)	45H(64)	55H(31)
233	45H(43)	65H(53)	65H(32)
234	45H(21)	55H(64)	45H(20)
235	55H(31)	55H(64)	45H(44)
